# Supplementary material for: Synergistic phase and crystallinity engineering in cubic RuSe2 catalysts towards efficient hydrogen evolution reaction
Source: Royal Society of Chemistry journal article supplement (doi:10.1039/d1ce01378e), 2021-12-20
Supplement: d1ce01378e1.pdf [file d1ce01378e1.pdf]

## Supporting Information

### **Synergistic Phase and Crystallinity Engineering in Cubic RuSe<sub>2</sub> Catalyst toward Efficient Hydrogen Evolution Reaction**

Wei Zhan, Nan Li\*, Shixiang Zuo, Zhimin Guo, Chenghong Qiang, Zhengping Li and  
Jiangquan Ma\*

Jiangsu Province Advanced Catalysis and Green Manufacturing Collaborative Innovation  
Center, Changzhou University, Changzhou, Jiangsu Province 213164, China.

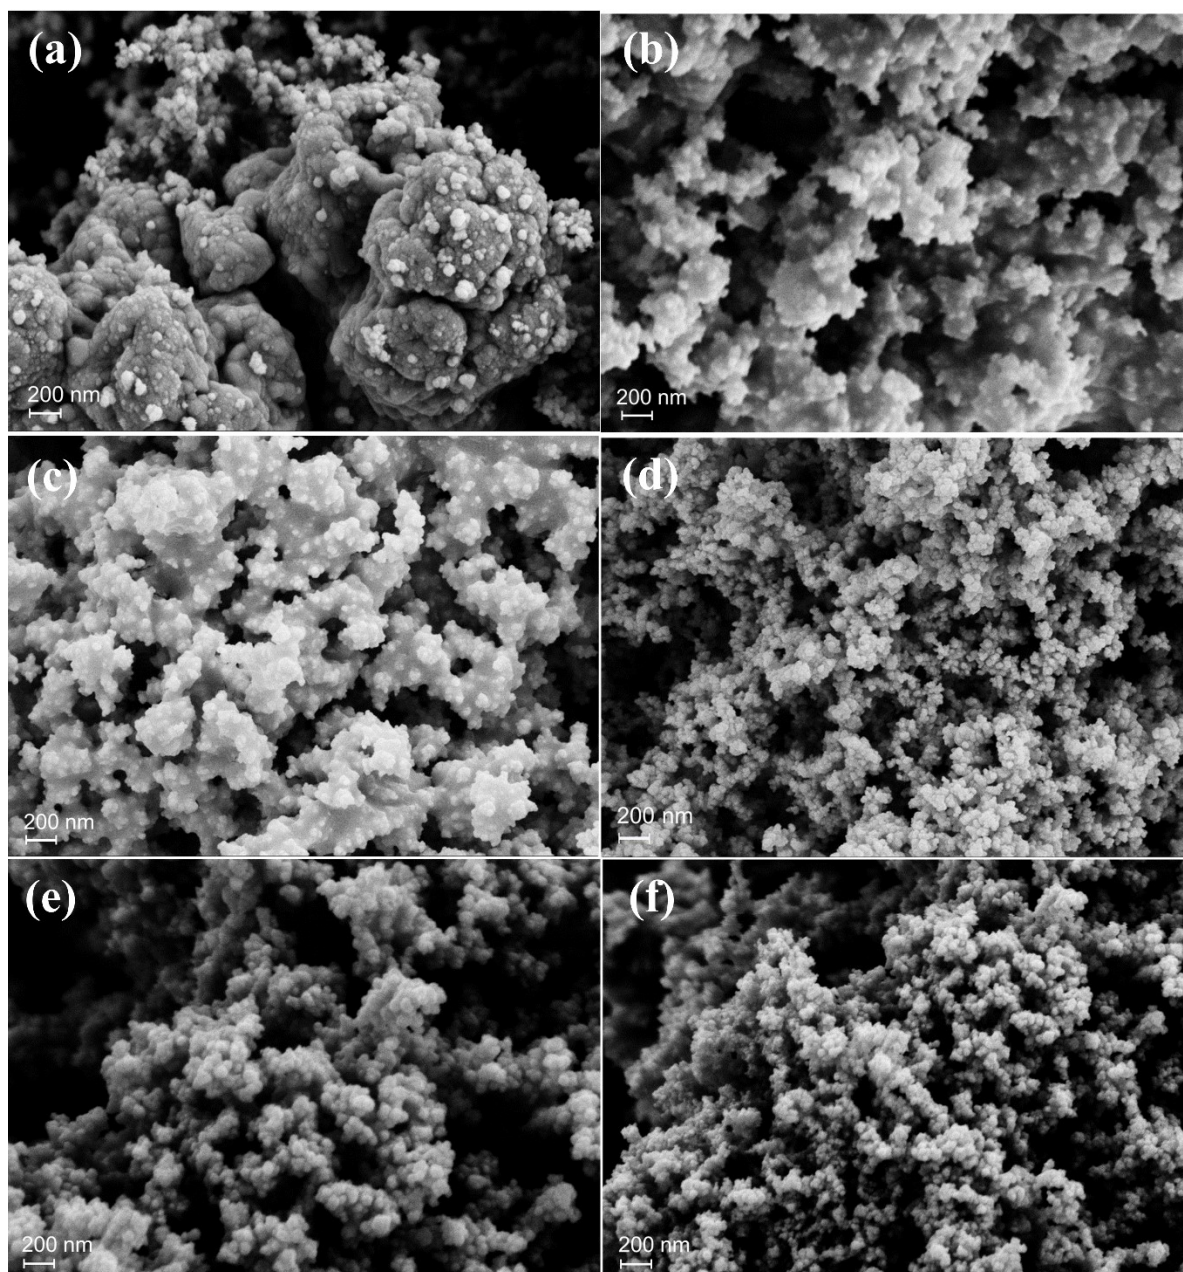

**Fig. S1** SEM images of (a) Fresh-RuSe<sub>2</sub>, (b) RuSe<sub>2</sub>-200, (c) RuSe<sub>2</sub>-250, (d) RuSe<sub>2</sub>-300, (e) RuSe<sub>2</sub>-400, and (f) RuSe<sub>2</sub>-600.

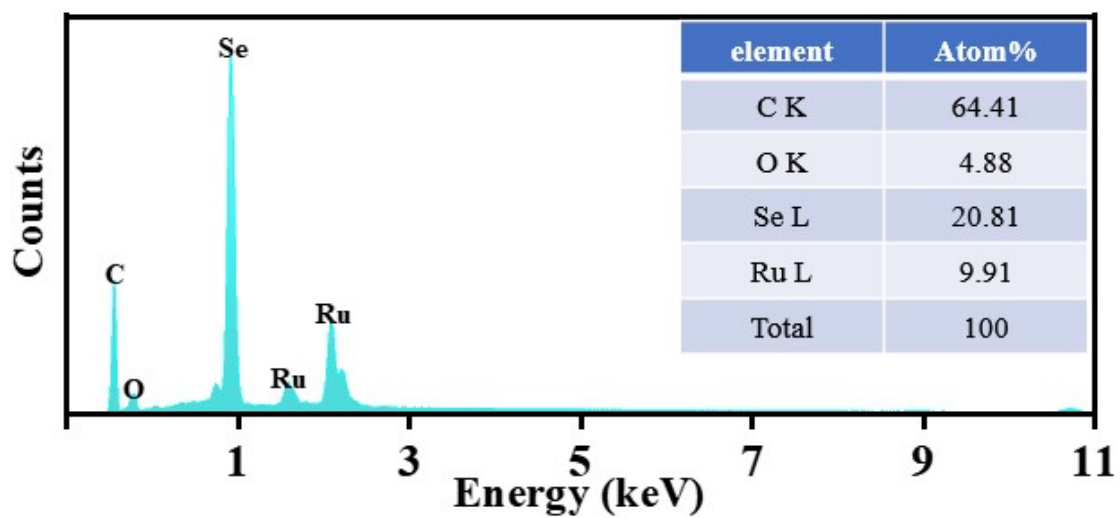

Fig. S2 EDS spectrum of RuSe<sub>2</sub>-500.

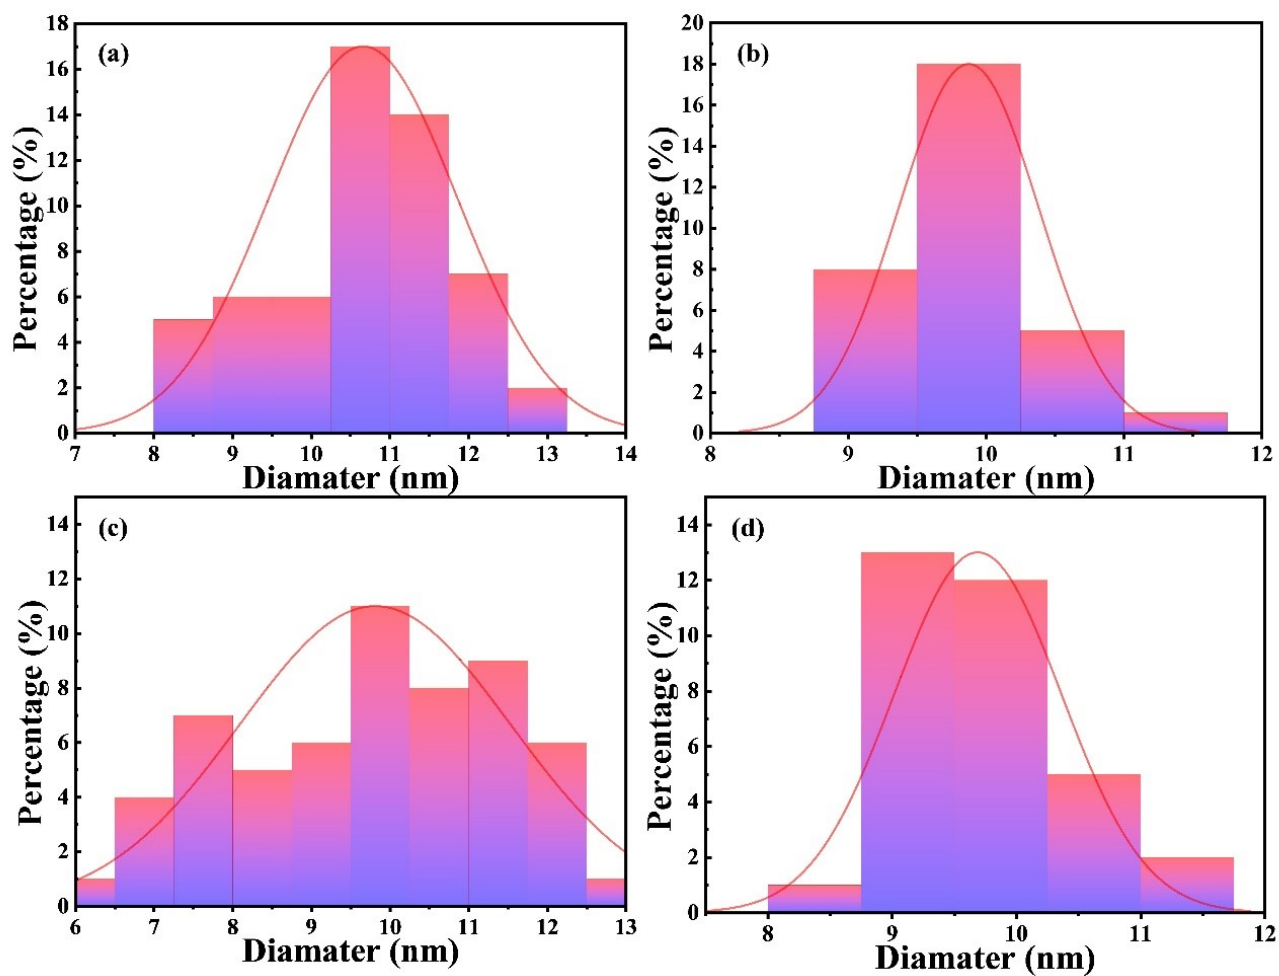

**Fig. S3** Particle size distribution of RuSe<sub>2</sub>-300 (a), RuSe<sub>2</sub>-400 (b), RuSe<sub>2</sub>-500 (c), and RuSe<sub>2</sub>-600 (d). The average diameter is 9.89, 9.87, 9.81 and 9.69 nm, respectively.

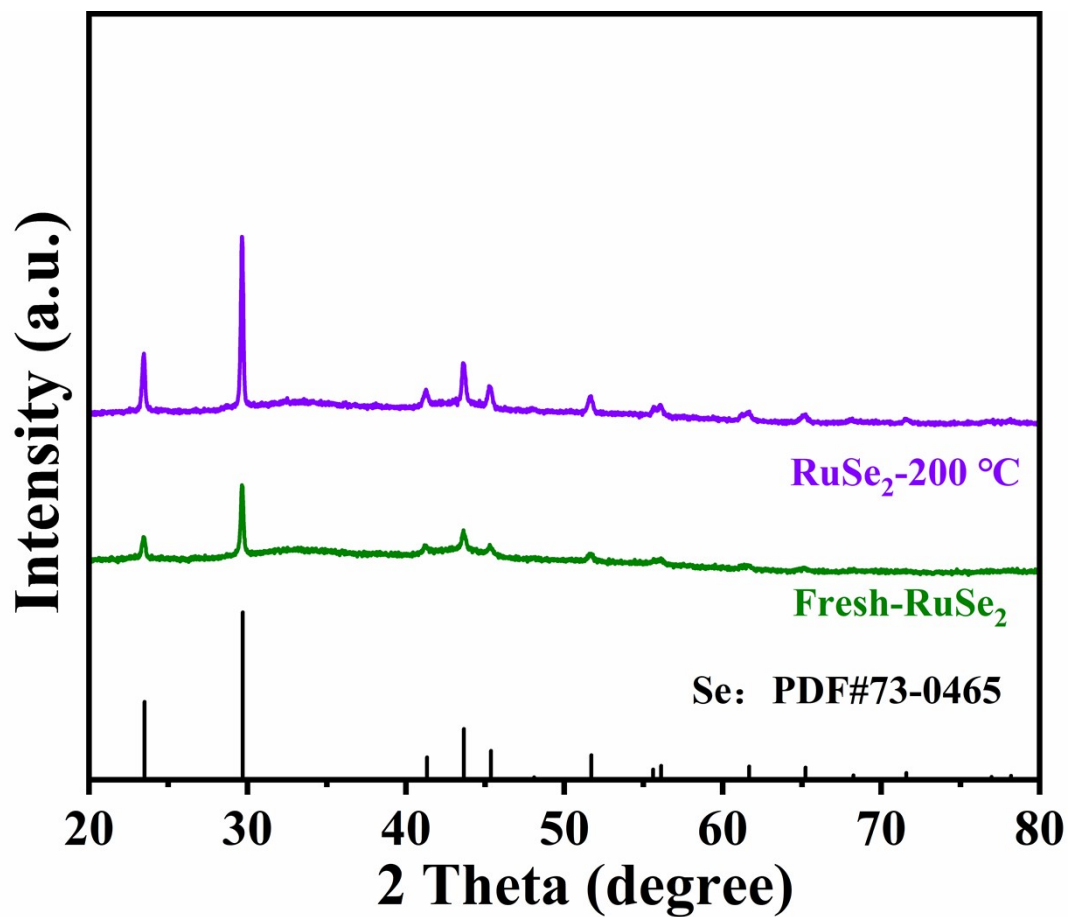

Fig. S4 XRD patterns of Fresh-RuSe<sub>2</sub> and RuSe<sub>2</sub>-200.

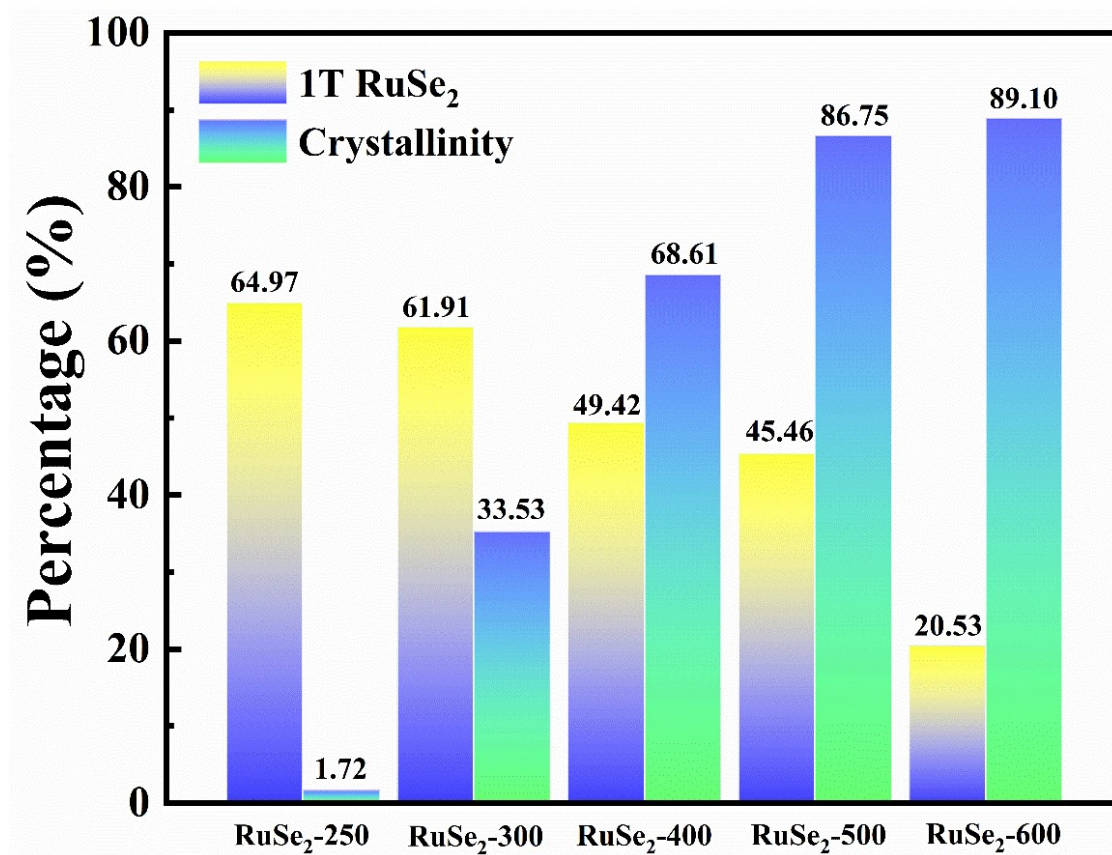

**Fig. S5** 1T-phase and crystallinity ratios in RuSe<sub>2</sub>-250, RuSe<sub>2</sub>-300, RuSe<sub>2</sub>-400, RuSe<sub>2</sub>-500 and RuSe<sub>2</sub>-600.



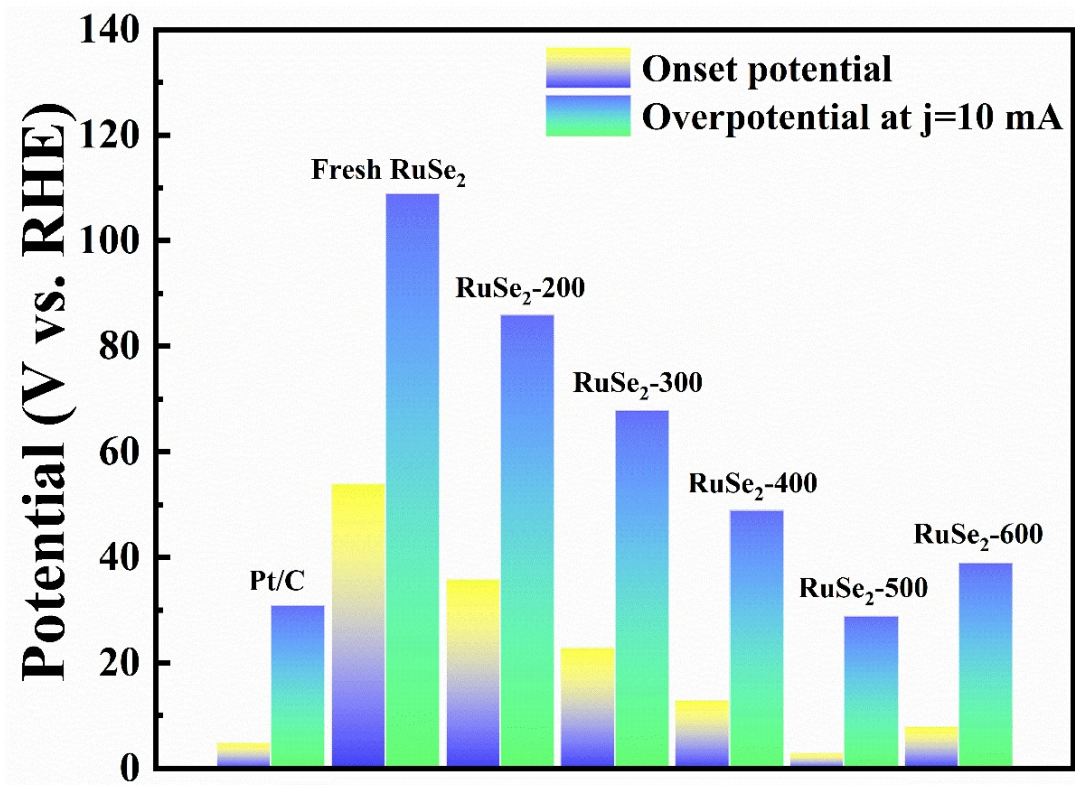

**Fig. S6** Onset potential and overpotential at current density of  $10 \text{ mA}\cdot\text{cm}^{-2}$  for Pt/C, Fresh-RuSe<sub>2</sub>, RuSe<sub>2</sub>-250, RuSe<sub>2</sub>-300, RuSe<sub>2</sub>-400, RuSe<sub>2</sub>-500 and RuSe<sub>2</sub>-600.

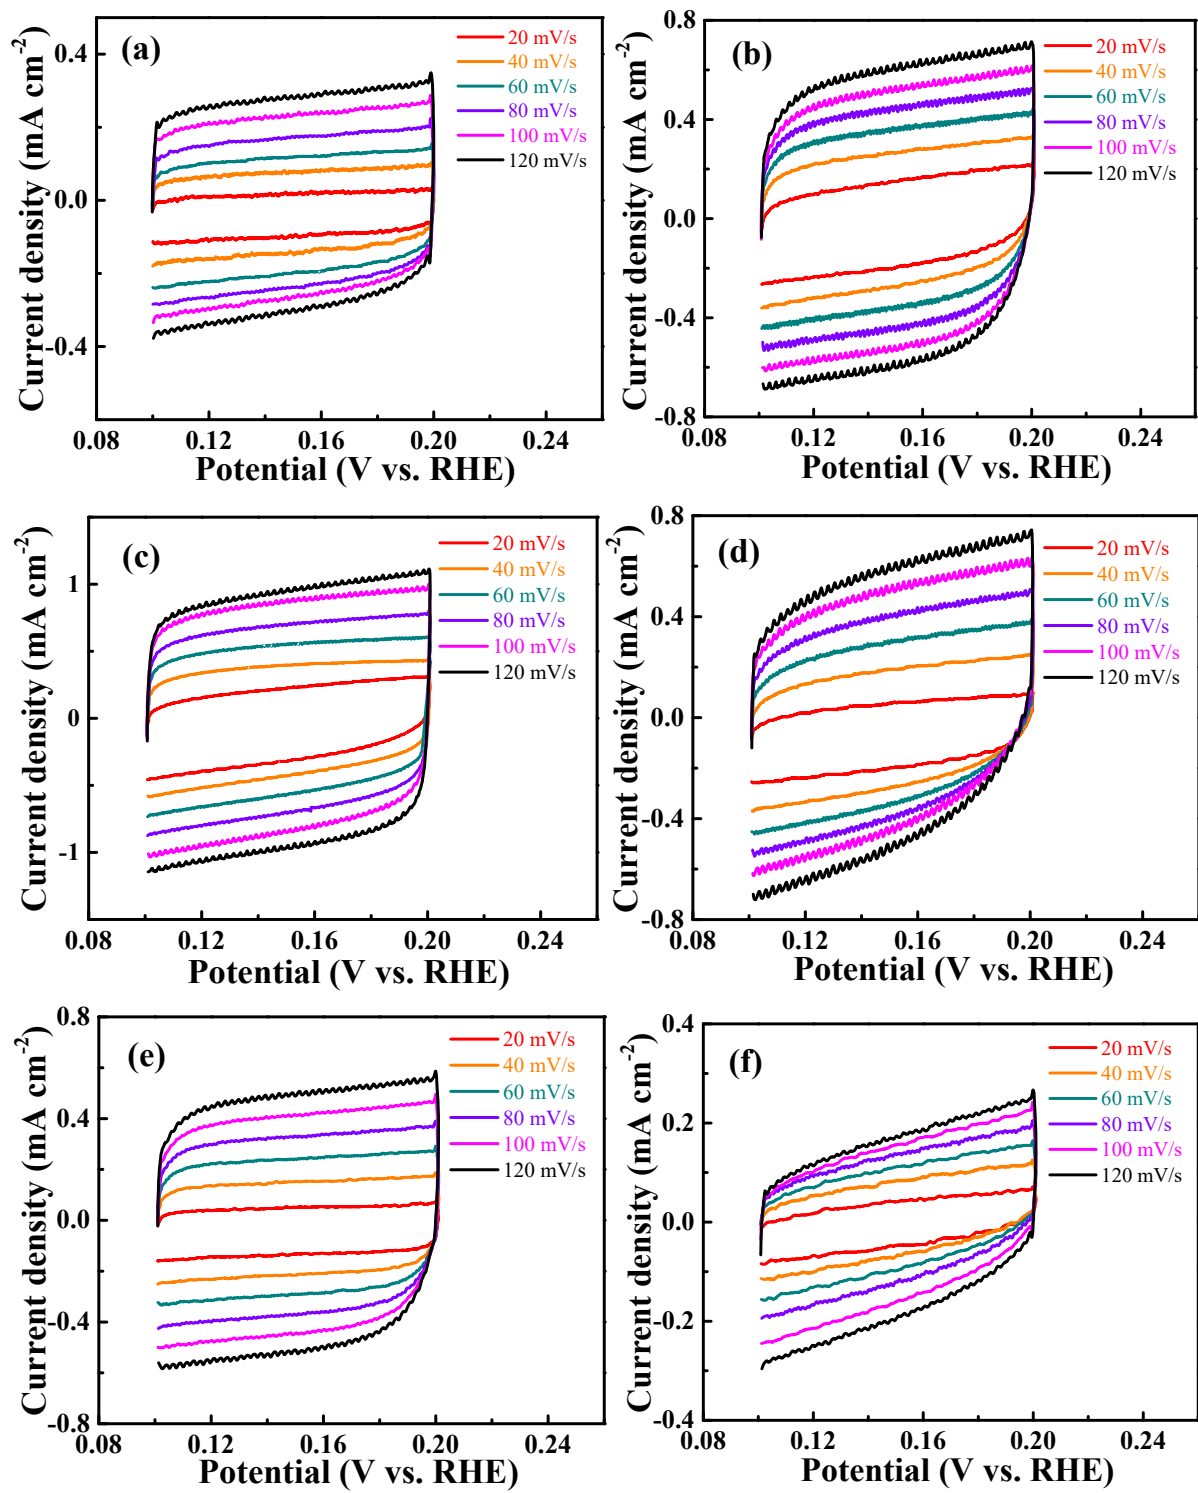

**Fig. S7** CV curves of (a) Fresh-RuSe<sub>2</sub>, (b) RuSe<sub>2</sub>-250, (c) RuSe<sub>2</sub>-300, (d) RuSe<sub>2</sub>-400, (e) RuSe<sub>2</sub>-500, and (f) RuSe<sub>2</sub>-600 at various scan rates from 20-120 mV/s.



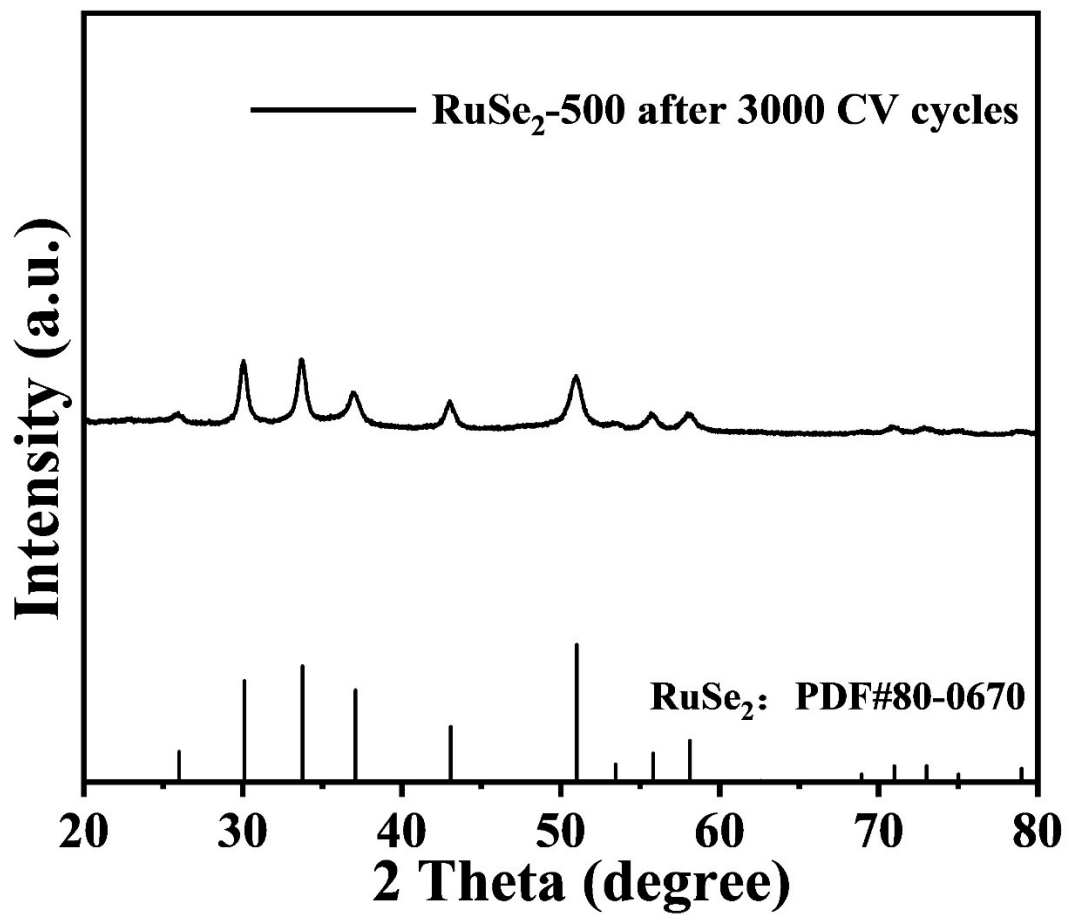

Fig. S8 XRD pattern of RuSe<sub>2</sub>-500 after long-time stability test.

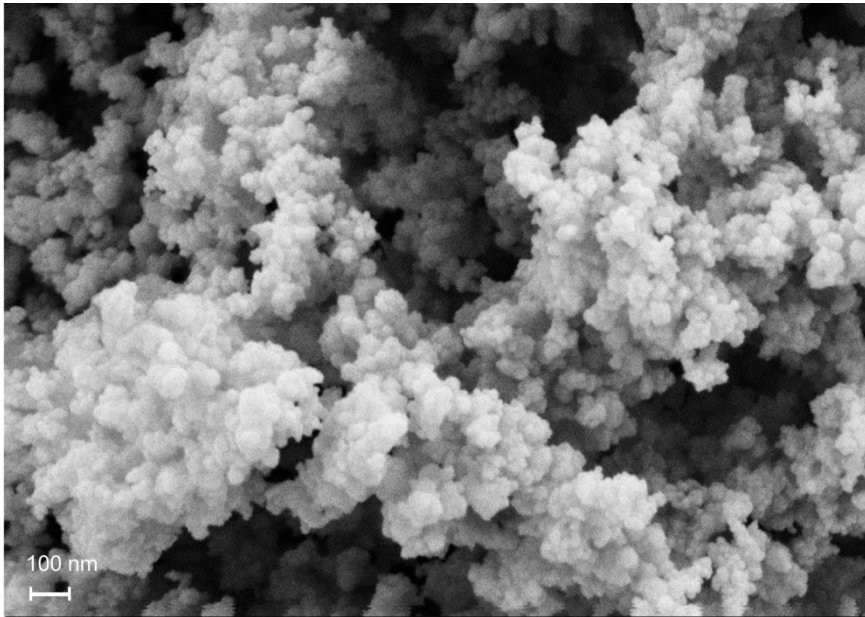

**Fig. S9** SEM image of RuSe<sub>2</sub>-500 after long-time stability test.

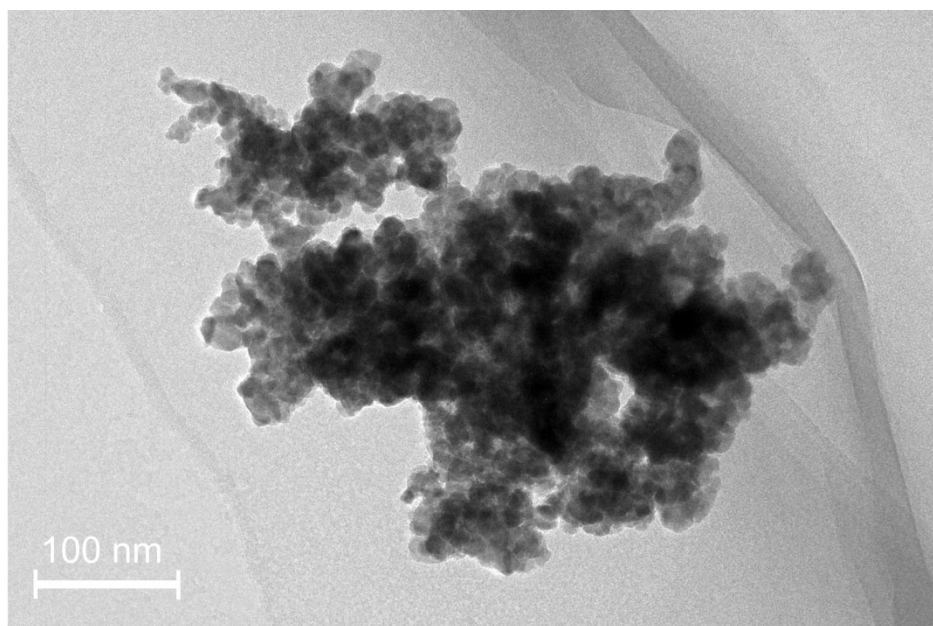

**Fig. S10** TEM image of RuSe<sub>2</sub>-500 after long-time stability test.

**Table S1.** Data for calculating crystallinity of RuSe<sub>2</sub> catalysts.

| Catalyst               | $\Sigma I_c$ | $\Sigma I_a$ | Crystallinity |
|------------------------|--------------|--------------|---------------|
| RuSe <sub>2</sub> -250 | 47159.15     | 2694651.85   | 1.72%         |
| RuSe <sub>2</sub> -300 | 75666.15     | 150000.85    | 33.53%        |
| RuSe <sub>2</sub> -400 | 365593.19    | 167263.81    | 68.61%        |
| RuSe <sub>2</sub> -500 | 526038.99    | 80346.01     | 86.75%        |
| RuSe <sub>2</sub> -600 | 625958.69    | 76576.32     | 89.10%        |

**Table S2** Comparison of the features of HER parameters between the present RuSe<sub>2</sub>-500 and other electrocatalytic materials in the literature.

| Catalyst                                    | Mass loading (mg cm <sup>-2</sup> ) | Substrate | Electrolyte | $\eta$ (mV) at 10 mA cm <sup>-2</sup> | Ref       |
|---------------------------------------------|-------------------------------------|-----------|-------------|---------------------------------------|-----------|
| <b>h-RuSe<sub>2</sub></b>                   | 0.30                                | GC        | 1.0 M KOH   | 34                                    | S1        |
| <b>Ru<sub>x</sub>Se</b>                     | 1                                   | CFP       | 1.0 M KOH   | 45                                    | S2        |
| <b>RuSe<sub>2</sub>/CNT</b>                 | 0.437                               | RDE       | 1.0 M KOH   | 29.5                                  | S3        |
| <b>Ru<sub>0.33</sub>Se@TNA</b>              | -                                   | CC        | 1.0 M KOH   | 57                                    | S4        |
| <b>RhSe<sub>2</sub></b>                     | 0.34                                | GC        | 1.0 M KOH   | 81.6                                  | S5        |
| <b>PdSe<sub>2</sub></b>                     | 0.34                                | GC        | 1.0 M KOH   | 138                                   | S6        |
| <b>IrSe<sub>2</sub></b>                     | 0.25                                | GC        | 1.0 M KOH   | 72                                    | S7        |
| <b>RuS<sub>2</sub></b>                      | 0.278                               | GC        | 1.0 M KOH   | 78                                    | S8        |
| <b>RuS<sub>x</sub>/S-GO</b>                 | 1                                   | CFP       | 1.0 M KOH   | 58                                    | S9        |
| <b>RuP<sub>2</sub>@NPC</b>                  | 1                                   | GC        | 1.0 M KOH   | 52                                    | S10       |
| <b>Ru-MoS<sub>2</sub>/CNT</b>               | 1                                   | CFP       | 1.0 M KOH   | 50                                    | S11       |
| <b>Ru<sub>0.10</sub>@2H-MoS<sub>2</sub></b> | 0.285                               | GC        | 1.0 M KOH   | 51                                    | S12       |
| <b>Ni-W-600</b>                             | 3                                   | GC        | 1.0 M KOH   | 59                                    | S13       |
| <b>CuCo<sub>2</sub>-P</b>                   | 6.5                                 | CF        | 1.0 M KOH   | 49.5                                  | S14       |
| <b>RuTe<sub>2</sub></b>                     | -                                   | GC        | 1.0 M KOH   | 34                                    | S15       |
| <b>RuSe<sub>2</sub>-500</b>                 | 0.275                               | GC        | 1.0 M KOH   | <b>29</b>                             | This work |
| <b>Pt/C</b>                                 | 0.275                               | GC        | 1.0 M KOH   | <b>31</b>                             | This work |



## Supplementary References

- S1. Y. M. Zhao, H. J. Cong, P. Li, D. Wu, S. L. Chen, W. Luo, *Angew. Chem., Int. Ed.*, 2021, **60**, 7013-7017.
- S2. K. F. Wang, B. Li, W. Wei, J. G. Wang, Q. Shen, P. Qu, *Nanoscale*, 2020, **12**, 23740-23747.
- S3. Z. Zhang, C. Jiang, P. Li, K. G. Yao, Z. L. Zhao, J. T. Fan, H. Li, H. J. Wang, *Small*, 2021, **17**, 2007333.
- S4. K. F. Wang, Q. Chen, Y. Y. Hu, W. Wei, S. Z. Wang, Q. Shen, P. Qu, *Small*, 2018, **14**, 1802132.
- S5. W. W. Zhong, B. B. Xiao, Z. P. Lin, Z. P. Wang, L. G. Huang, S. J. Shen, Q. H. Zhang, L. Gu, *Adv. Mater.*, 2021, **33**, 2007894.
- S6. Z. P. Lin, B. B. Xiao, Z. P. Wang, W. Y. Tao, S. J. Shen, L. A. Huang, J. T. Zhang, F. Q. Meng, Q. H. Zhang, L. Gu, W. W. Zhong, *Adv. Funct. Mater.*, 2021, **31**, 2102321.
- S7. T. T. Zheng, C. Y. Shang, Z. H. He, X. Y. Wang, C. Cao, H. L. Li, R. Si, B. C. Pan, S. M. Zhou, J. Zeng, *Angew. Chem., Int. Ed.*, 2019, **58**, 14764-14769.
- S8. Y. L. Zhu, H. A. Tahini, Y. Wang, Q. Lin, Y. Liang, C. M. Doherty, Y. Liu, X. Y. Li, J. Lu, S. C. Smith, C. Selomulya, X. W. Zhang, Z. P. Shao, H. T. Wang, *J. Mater. Chem. A*, 2019, **7**, 14222-14232.
- S9. P. S. Li, X. X. Duan, S. Y. Wang, L. R. Zheng, Y. P. Li, H. H. Duan, Y. Kuang, X. M. Sun, *Small*, 2019, **15**, 1904043.
- S10. Z. H. Pu, I. S. Amiinu, Z. K. Kou, W. Q. Li, S. C. Mu, *Angew. Chem., Int. Ed.*, 2017, **56**, 11559-11564.

- S11. X. Zhang, F. Zhou, S. Zhang, Y. Y. Liang, R. H. Wang, *Adv. Sci.*, 2019, **6**, 1900090.
- S12. J. Wang, W. H. Fang, Y. Hu, Y. H. Zhang, J. Q. Dang, Y. Wu, B. Z. Chen, H. Zhao, Z. X. Li, *Appl. Catal., B*, 2021, **298**, 120490.
- S13. Y. K. Li, G. Zhang, H. Huang, W. T. Lu, F. F. Cao, Z. G. Shao, *Small*, 2020, **16**, 2005184.
- S14. Y. Cheng, Y. Pei, P. Y. Zhuang, H. Chu, Y. D. Cao, W. Smith, P. Dong, J. F. Shen, M. X. Ye, P. M. Ajayan, *Small*, 2019, **15**, 1904681.
- S15. B. Tang, X. D. Yang, Z. H. Kang, L. G. Feng, *Appl. Catal., B*, 2020, **278**, 119281.
